# Supplementary material
Source: PubMed Central journal article supplement (PMC3032569)
Supplement: NIHMS266545-supplement-01.pdf [file NIHMS266545-supplement-01.pdf]

## SUPPLEMENTARY ONLINE DATA

# Molecular characterization of the TonB2 protein from the fish pathogen *Vibrio anguillarum*

Claudia S. LÓPEZ<sup>\*1</sup>, R. Sean PEACOCK<sup>†1</sup>, Jorge H. CROSA<sup>\*2</sup> and Hans J. VOGEL<sup>†2</sup>

<sup>\*</sup>Department of Molecular Microbiology and Immunology L-220, Oregon Health and Science University, Portland, OR 97239, U.S.A., and <sup>†</sup>Department of Biological Sciences, University of Calgary, 2500 University Drive N.W., Calgary, AB, Canada T2N 1N4

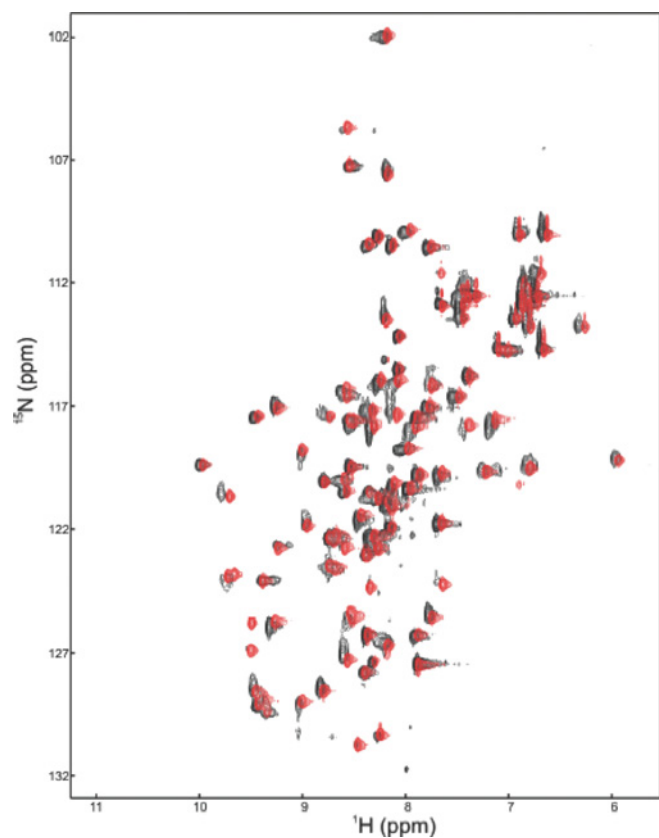

**Figure S1 Titration of TonB2 CTD with the FatA TonB-box**

The TonB2 CTD <sup>1</sup>H/<sup>15</sup>N HSQC spectrum is in black. That of the TonB2 CTD with the FatA TonB-box is in red. The small shifts that are observed are similar to those seen when the pH of the solution is changed from 7.0 to 6.5, and the residues that are affected are distributed essentially randomly across the protein surface.

<sup>1</sup> These authors contributed equally to this work.

<sup>2</sup> Correspondence may be sent to either of these authors (email crosajor@ohsu.edu or vogel@ucalgary.ca).

**Table S1 Primers used in the present study**

Underlined sequences indicate restriction sites for BamHI and PstI restriction enzymes. Italics shown in the tonB2-AAA- and tonB2-6AC'-primers indicate the codons mutated to alanine as compared with the wild-type *tonB2* sequence. RT-PCR, reverse transcription PCR.

| Name        | Sequence 5' to 3'                                                 | Used in:    |
|-------------|-------------------------------------------------------------------|-------------|
| tonB2R      | 5'- <u>GGATCCT</u> CATCATTGGCAATTTAAACTCC-3'                      | RT-PCR, PCR |
| FtonB2      | 5'- <u>CTGCAGCGGAGT</u> GAAAAATATCGCATTGG-3'                      | PCR         |
| Delta 2     | 5'- <u>GGATCCT</u> CATCAAATTTAAACTCCACAGT-3'                      | PCR         |
| Delta 3     | 5'- <u>GGATCCT</u> CATCATTAAACTCCACAGTCAC-3'                      | PCR         |
| Delta 4     | 5'- <u>GGATCCT</u> CATCAAAACTCCACAGTCACGGT-3'                     | PCR         |
| tonB2-AAA-  | 5'- <u>GGATCCT</u> CATCA <u>TGCGGCAGCTTTAAACTC</u> -3'            | PCR         |
| tonB2-6AC'  | 5'- <u>GATCCT</u> CATCA <u>TGCGGCAGCTGCAGCCGC</u> CACAGTCACGGT-3' | PCR         |
| tonB2-106   | 5'-CACCAGCGCACCAACCTTTGGTGAT-3'                                   | PCR         |
| tonB2-76    | 5'-CACCACACAGTCACAAACTACCGCT-3'                                   | PCR         |
| FtonBEc     | 5'- <u>CTGCAGCTT</u> ATTGAATATGATTGC-3'                           | PCR         |
| RtonBEc     | 5'- <u>GGATC</u> CAATTGGGCAACGCTATAAG-3'                          | PCR         |
| tonBEcΔβ4   | 5'- <u>GGATCCT</u> CATCAGCCGTTAATTTAAACAGGATATTCACCAC-3'          | PCR         |
| 4B2AR       | 5'-TAAACCGACCAACTGTCCGCCACCA-3'                                   | SOE         |
| TonB2/Ec    | 5'- <u>GATCCT</u> CACTGAATTTCCGGTGGTTTTGGCAATTTAAACTCCACAGT-3'    | PCR         |
| Loop3/R     | 5'-GTGATATCAATGTCGTGATATGTTGAGCGTGAAGCGATG-3'                     | SOE         |
| Loop3/F     | 5'-CGATGCAAGCGCTGAAAAACAACCGTGACTGTGGAGTTAAA-3'                   | SOE         |
| L3-179-184R | 5'-ATTGGCTTTACCGTCGACAATTTTTTCAGCGCTTGCCATCGC-3'                  | SOE         |
| L3-179-184F | 5'-GCGATGCAAGCGCTGAAAAAATTGTCGACGGTAAAGCCATT-3'                   | SOE         |
| L3-185-190R | 5'-GGTTTGTCGCGGCTGCTCAATCTGAGGTTGATACTTCCATT-3'                   | SOE         |
| L3-185-190F | 5'-AAATGGAAGTATCAACCTCAGATTGAGCAGCCGGGACAAACC-3'                  | SOE         |
| L3-191-195R | 5'-AAACTCCACAGTCACGGTTTGGGCTTTACCGTCGACAATCTG-3'                  | SOE         |
| L3-191-195F | 5'-GACATTGTCGACGGTAAAGCCAAACCGTGACTGTGGAGTTT-3'                   | SOE         |

Received 22 July 2008/23 October 2008; accepted 30 October 2008  
 Published as BJ Immediate Publication 30 October 2008, doi:10.1042/BJ20081462
